# Supplementary material
Source: PubMed Central journal article supplement (PMC3527684)
Supplement: NIHMS414152-supplement-Supporting_Information.pdf [file NIHMS414152-supplement-Supporting_Information.pdf]

Supporting Information for

**Protein-Protected Au Clusters as a New Class of Nanoscale Biosensors for  
Label-Free Fluorescence Detection of Proteases with High Sensitivity\*\***

*Yucai Wang, Yi Wang, Fengbo Zhou, Paul Kim, and Younan Xia\**

[\*] Prof. Y. Xia, Dr. Y. Wang, Y. Wang  
The Wallace H. Coulter Department of Biomedical Engineering  
Georgia Institute of Technology and Emory University, Atlanta, GA 30332 (USA)  
E-mail: younan.xia@bme.gatech.edu

F. Zhou, P. Kim  
Department of Biomedical Engineering  
Washington University, Saint Louis, MO 63130 (USA)

[\*\*] This work was supported in part by an NIH Director's Pioneer Award (DP1 OD000798), a research grant from the NCI (R01 CA13852701), and startup funds from Georgia Institute of Technology.

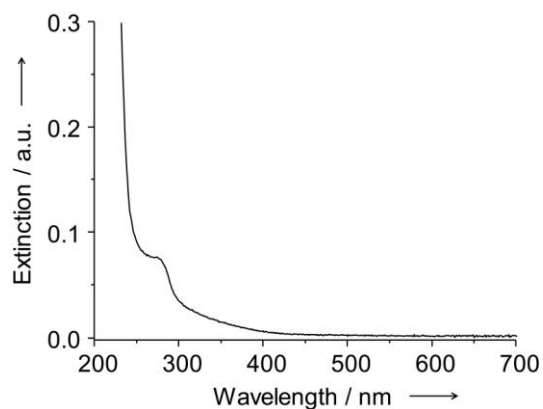

**Figure S1.** UV-vis extinction spectrum of an aqueous suspension of BSA-AuCs. The aqueous suspension of AuCs had an extinction peak around 280 nm due to the absorption of aromatic amino acids in BSA. No extinction peak was observed at 520 nm, indicating the absence of large Au nanoparticles in the sample.

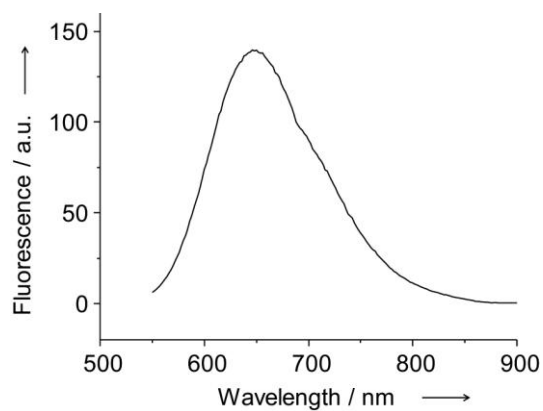

**Figure S2.** Fluorescence emission spectrum ( $\lambda_{\text{ex}} = 500$  nm) of an aqueous suspension of BSA-AuCs.

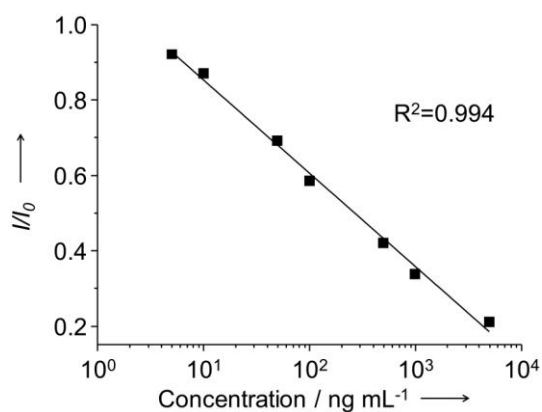

**Figure S3.** Linear fit for a plot of  $I/I_0$  as a function of proteinase K concentration after the mixtures of BSA-AuCs and protease had been incubated for 4 h.  $I$  and  $I_0$  represent fluorescence intensities of BSA-AuCs in the absence and presence of proteases, respectively

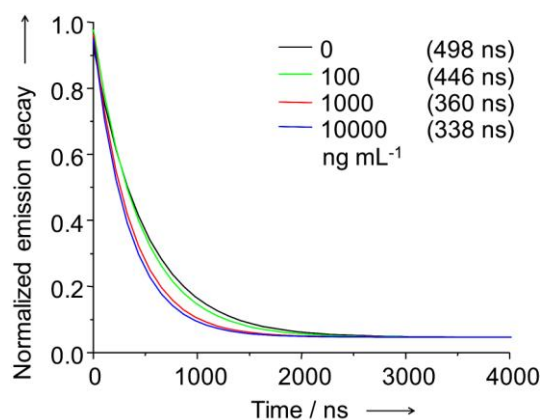

**Figure S4.** Fluorescence decay curves for aqueous suspensions of BSA-AuCs after incubation with proteinase K at different concentrations for 4 h. Numbers in the parenthesis represent the corresponding calculated fluorescence lifetimes.

**Table S1.** Summary of protein substrates and proteases that have been examined for the fluorescence-based detection using protein-protected AuCs.

| Protein substrate | Protease              | Linear range (ng mL <sup>-1</sup> )       | $I/I_0 = A \log(C) + B^a$ |      |                |
|-------------------|-----------------------|-------------------------------------------|---------------------------|------|----------------|
|                   |                       |                                           | A                         | B    | R <sup>2</sup> |
| BSA               | $\alpha$ -Chymotrypin | 10 – 1 × 10 <sup>6</sup>                  | -0.14                     | 1.06 | 0.993          |
| BSA               | Trypsin               | 10 – 1 × 10 <sup>6</sup>                  | -0.11                     | 1.03 | 0.987          |
| BSA               | Papain                | 1 × 10 <sup>3</sup> – 5 × 10 <sup>5</sup> | -0.21                     | 1.65 | 0.991          |
| BSA               | Protease XIII         | N.A. <sup>b</sup>                         | N.A.                      | N.A. | N.A.           |
| BSA               | Proteinase K          | 5 – 5 × 10 <sup>3</sup>                   | -0.20                     | 1.08 | 0.994          |
| Insulin           | Proteinase K          | 1 × 10 <sup>4</sup> – 1 × 10 <sup>6</sup> | -0.19                     | 1.83 | 0.991          |
| Lysozyme          | Proteinase K          | 1 × 10 <sup>3</sup> – 1 × 10 <sup>6</sup> | -0.22                     | 1.59 | 0.993          |
| Transferrin       | Proteinase K          | 10 – 1 × 10 <sup>5</sup>                  | -0.21                     | 1.25 | 0.984          |

<sup>a</sup>  $I_0$  and  $I$  represent intensities of fluorescence from BSA-AuCs in the absence and presence of proteases, respectively.  $C$  represents the concentration of protease in ng mL<sup>-1</sup>.

<sup>b</sup> Not available.
